# Supplementary material for: Frequent clonal relations between metastases and non-index prostate cancer lesions
Source: JCI journal article supplement (doi:10.1172/jci.insight.124756), 2019-01-23
Supplement: sd1 [file 1]

## Supplementary Files

### Supplementary Table S1 – Patient 11 characteristics

| Clinical variables                            |               |
|-----------------------------------------------|---------------|
| Age at prostatectomy (years)                  | 73            |
| cT stage                                      | T3c           |
| NM stage                                      | NOM0          |
| Initial PSA (ng/ml)                           | 9             |
| Neo-adjuvant therapy                          | No            |
| Pathology review prostatectomy                |               |
| Weight after fixation (grams)                 | 35            |
| Dimensions (cm)                               | 4.0 x 3.5 x 3 |
| pT Stage                                      | T3b           |
| Resection                                     | R1            |
| Number of clones                              | 6             |
| Largest diameter index lesion (mm)            | 35.0 x 25.7   |
| Gleason Score index lesion                    | 5 + 4         |
| Pathology review pelvic lymph node dissection |               |
| pN Stage                                      | N1            |
| Number of lymph nodes                         | 16            |
| Tumor positive lymph nodes                    | 15            |
| Number of lymph nodes assessed                | 4             |
| Metastasis size 3-5mm                         | 2             |
| Metastasis size >5mm                          | 2             |

**Supplementary Figure S1 – Comparison of patient 11 pathological findings and clinical MRI findings**

**A**

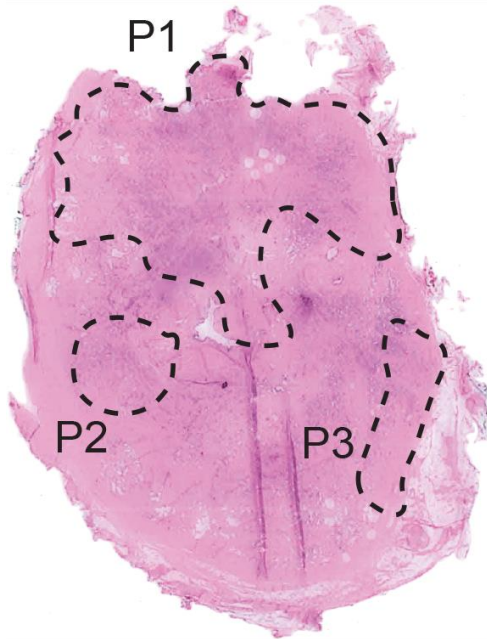

**B**

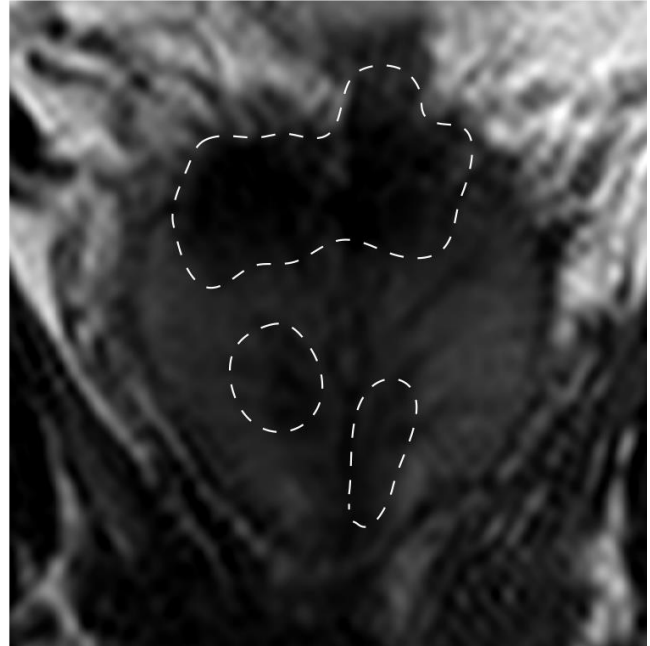

**Supplementary Figure S1 - A** H&E staining of whole prostate mount slice of patient 11, showing three distinct primary tumor areas, Figure 1C shown here again as comparison for MRI image. **B** MRI image of prostate of patient 11 showing three distinct tumor foci, delineated by white dashed line.

**Supplementary Figure S2 – CNA profiles of patients with P1 not clonal with N**

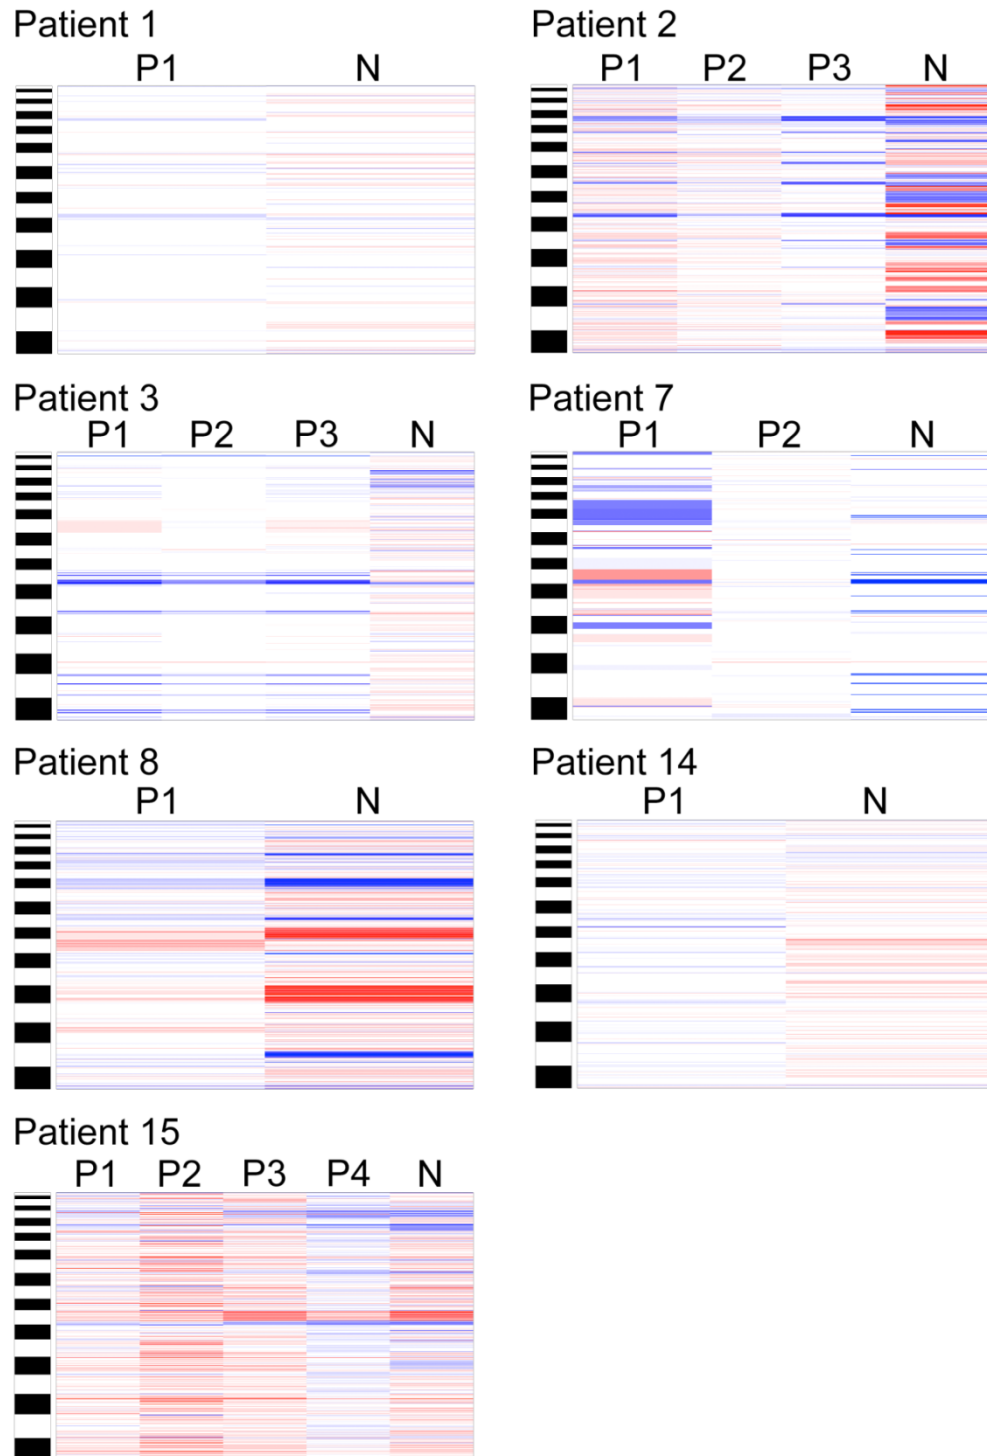

**Supplementary Figure S2** – CNA profiles of seven patients in which P1 is not clonal to N based on breakpoint similarities, bar on side represents genome per chromosome, red = amplification, blue = deletion. Clonality between N and a non-index primary focus (P3) was only detected in patient 15.
